# Supplementary material
Source: PubMed Central journal article supplement (PMC5003617)
Supplement: NIHMS810007-supplement-supp_fig1.pdf [file NIHMS810007-supplement-supp_fig1.pdf]

## Supplemental Figure 1

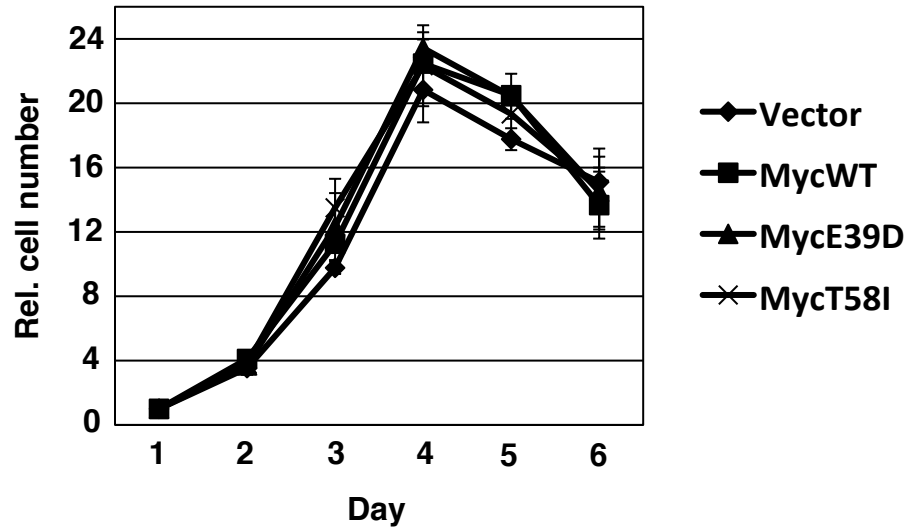

**Supplemental Figure 1. Proliferation rates of MycWT and BL-associated mutants, MycE39D and MycT58I, overexpressing cells.** Rat1a fibroblasts were engineered to express MycWT, the indicated Burkitt's Lymphoma (BL) Myc mutants or vector control. Log-phase cells were seeded at low density and total cell number was obtained for six consecutive days. At day 4, cells reached saturation density and began to die. Growth curve were performed in triplicate.
