# Supplementary material
Source: PubMed Central journal article supplement (PMC5003617)
Supplement: NIHMS810007-supplement-supp_fig2.pdf [file NIHMS810007-supplement-supp_fig2.pdf]

Supplemental Figure 2

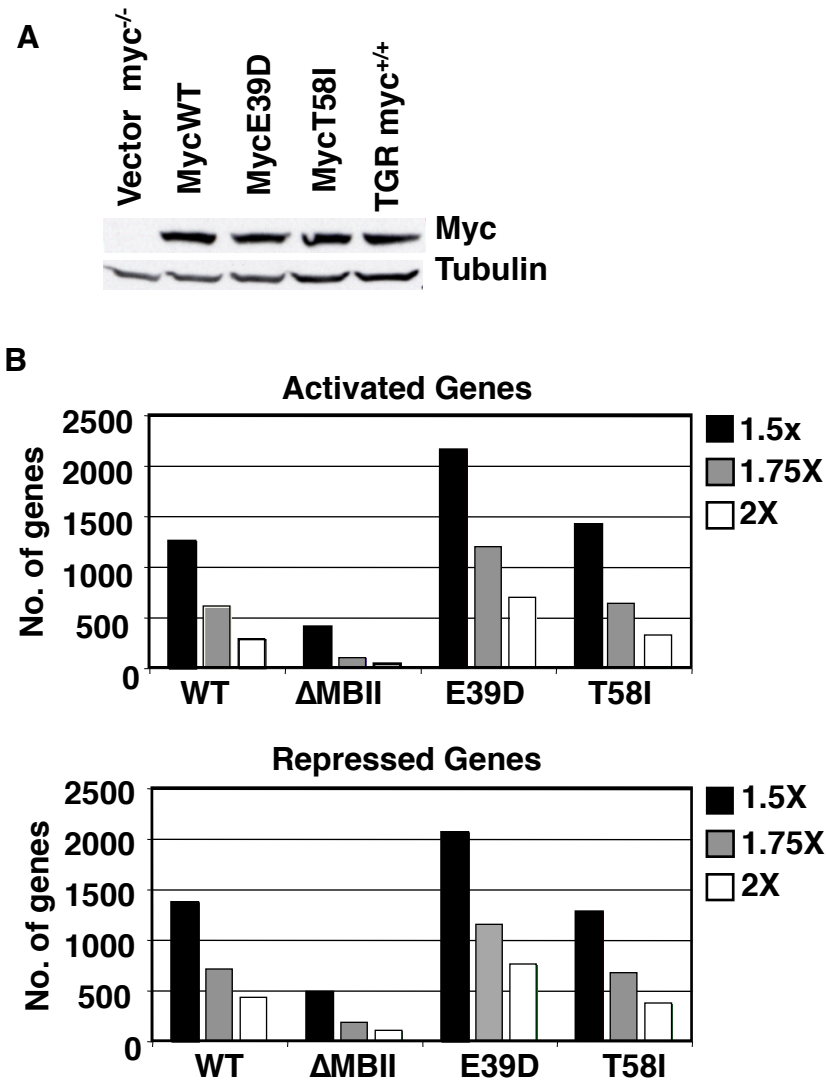

**Supplemental Figure 2. Myc expression levels and genes activated or repressed above thresholds in cells used in microarray analysis.** A) *myc*<sup>-/-</sup> fibroblasts were polyclonally engineered to express MycWT or the indicated Myc mutant. Expression levels were determined through western blot analysis and compared to the parental rat fibroblast line, TGR. B) Total number of genes activated or repressed at 1.5, 1.75, and 2-fold over vector control levels.
