# Supplementary material
Source: PubMed Central journal article supplement (PMC5003617)
Supplement: NIHMS810007-supplement-supp_fig3.pdf [file NIHMS810007-supplement-supp_fig3.pdf]

Supplemental Figure 3

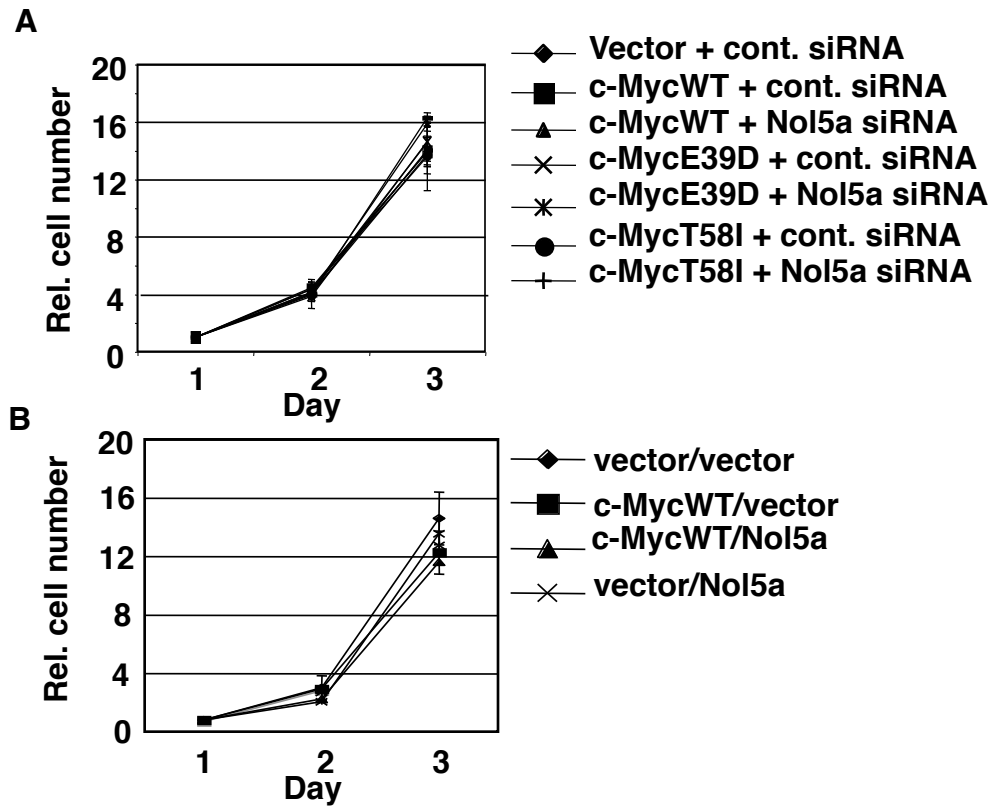

**Supplemental Figure 3. Proliferation rates of MycWT and Myc mutants upon overexpression or knockdown of Nof5a.** A) Rat1a fibroblasts engineered to express MycWT or the indicated BL-associated Myc mutant were treated with Nof5a siRNA or scramble control siRNA. Log-phase cells were seeded at low density after determination of reduced Nof5a expression. Cell number was obtained for three consecutive days after plating. B) Rat1a fibroblasts were engineered to express control vector, Nof5a, and/or MycWT. Log-phase cells were plated at a low density and cell numbers determined for six consecutive days. At day 4, cells reached saturation density and began to die. Growth curves were performed in triplicate.
