# Supplementary material
Source: PubMed Central journal article supplement (PMC5003617)
Supplement: NIHMS810007-supplement-supp_fig4.pdf [file NIHMS810007-supplement-supp_fig4.pdf]

Supplemental Figure 4

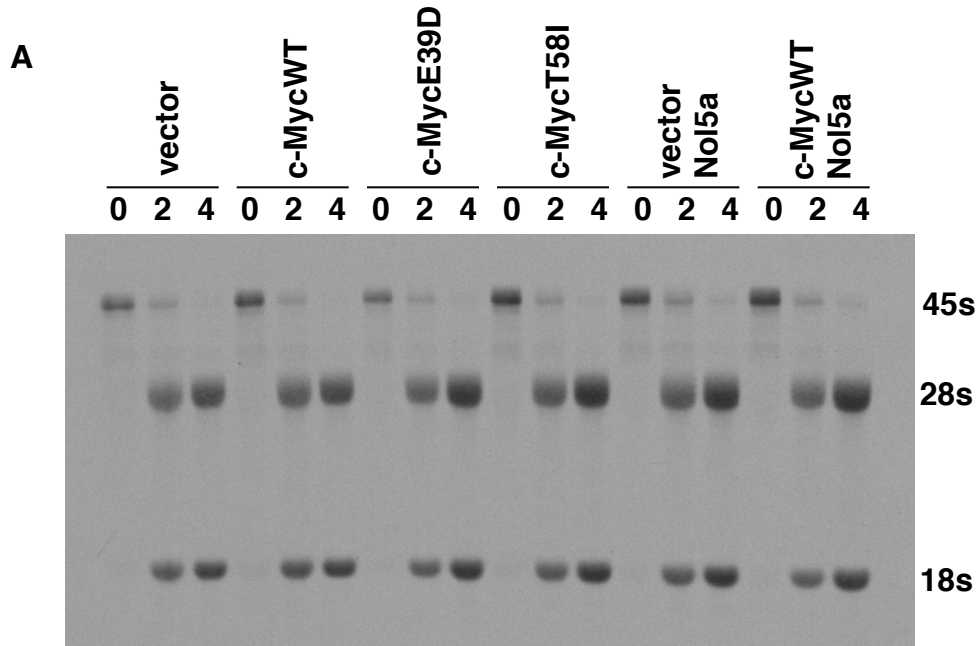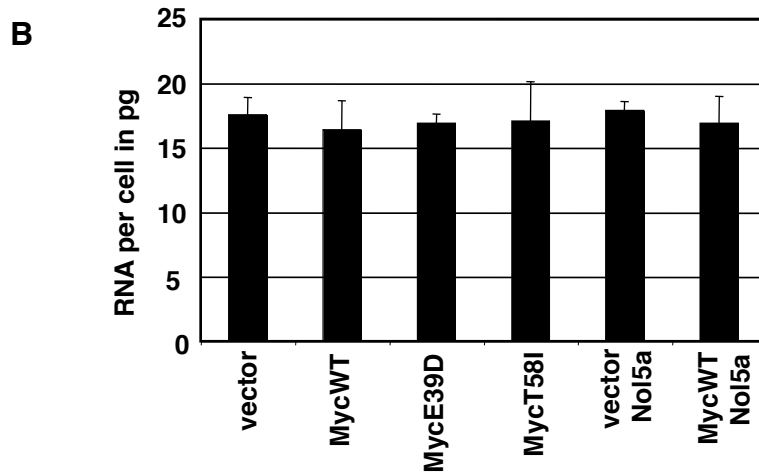

**Supplemental Figure 4. Rate of rRNA synthesis and processing.** A) Rat1a cells expressing the indicated Myc protein or Noli5a were pulsed with  $^3\text{H}$ -uridine for 30 min, followed by chase with cold uridine for 0, 2, 4hrs. RNA for each time point was run on a formaldehyde agarose gel and blotted on the Hybond-N membrane. Membrane was sprayed with EN3HANCE and exposed to film. B) Log-phase cell lines were counted, RNA was extracted and quantitated and RNA per cell was calculated. Total counts were obtained in 2 independent experiments.
